# Supplementary material for: Structure and Functional Properties of Bacillus subtilis Endospore Biogenesis Factor StoA
Source: PubMed Central journal article supplement — J Biol Chem. 2009 Apr 10;284(15):10056–66. doi: 10.1074/jbc.M809566200 (PMC2665060; doi:10.1074/jbc.m809566200), 2009-04-10
Supplement: M809566200_1.pdf [file M809566200_1.pdf]

## SUPPLEMENTAL DATA

### Structure and functional properties of *Bacillus subtilis* endospore- biogenesis factor StoA

Allister Crow, Yiming Liu, Mirja Carlsson Möller, Nick E. Le Brun and Lars Hederstedt

#### SUPPLEMENTAL EXPERIMENTAL PROCEDURES

*Purification of non-tagged sStoA*– *E. coli* TOP10/pLMC19 was grown in LB medium at 37 °C. At OD<sub>600</sub> ≈ 0.5 *stoA* expression was induced by adding L-arabinose (0.02% (w/v), final concentration). After incubation for 3 h, cells were collected by centrifugation, washed and suspended in 20 mM Tris-HCl, pH 8.0, containing 1 mM DTT and broken by passage (three times) through a French pressure cell operated at 18,000 Psi. The lysate was centrifuged at 48,000 × g for 40 min at 4 °C and the supernatant was centrifuged at 100,000 × g for 1 h at 4 °C. The resulting supernatant was applied to a HiLoad 26/10 Q Sepharose HP anion exchange column (GE healthcare) equilibrated with 20 mM Tris-HCl, pH 8.0, containing 1 mM DTT. Proteins were eluted using a gradient of 0 – 1 M NaCl in the same buffer. Fractions containing sStoA were pooled, buffer exchanged into 20 mM Tris-HCl, pH 8.0, 0.15 M NaCl, 1 mM DTT using an Amicon Ultra 15 centrifugal filter (10 kDa M<sub>w</sub> cut-off; Millipore) and applied to a Sephacryl S-100 HR gel filtration column (2.6 cm × 100 cm; GE Healthcare), equilibrated with 20 mM Tris-HCl, pH 8.0, 0.15 M NaCl, 1 mM DTT. Fractions containing sStoA were concentrated and buffer exchanged into 20 mM Tris-HCl, pH 8.0 as described above. The preparation was used in initial crystallisation trials and to generate a StoA antiserum.

*sStoA reduction potential determination*– The midpoint reduction potential of sStoA was determined by calculating the fraction of sStoA reduced,  $f_r$ , at each point in the fluorescence titration (data at 344 nm) and plotting this as a function of the system potential. The data were fitted to the Nernst equation (Equ. S1), in which  $E_m$ , the midpoint reduction potential of sStoA, and  $n$ , the number of electrons, were allowed to float.  $F$  is the Faraday constant,  $R$  is the gas constant,  $T$  is the temperature and  $E_h$  is the standard reduction potential of the DTT couple, which was taken to be -330 mV at pH 7 and 25 °C (1).

$$f_r = \frac{\exp^{(E_m - E_h)nF/RT}}{1 + \exp^{(E_m - E_h)nF/RT}} \quad (\text{S1})$$

*Determination of sStoA pK<sub>a</sub> values*– Following the reaction of cysteine side chains with alkylating reagents is a well established method for determining the pK<sub>a</sub> values of protein cysteine thiol groups, where the observed rate constant is proportional to the extent of thiol deprotonation at a given pH (2-4). Reduced protein solutions (wild-type and single-cysteine variants) were prepared in 10 mM Mops pH 7 with 2 mM TCEP as reductant. A mixed buffer solution (PCTC buffer: K<sub>2</sub>HPO<sub>4</sub>, sodium citrate, Tris and CHES, all at 50 mM) was used for each pH experiment. In each case, 2 μl badan (dissolved in DMF) was added to 3 ml PCTC solution giving a final badan concentration of 15 μM. The reaction was then started by addition of 50 μl protein solution to give a final protein concentration ~0.15 μM. The extent of badan modification over time was followed via the increase in badan fluorescence at 510 nm (when excited at 390 nm). Pseudo-first-order rate constants were obtained from fitting the data to Equ. S2:

$$F_t = F_{t=0} + (F_{t=\infty} - F_{t=0})e^{-k_o t} \quad (\text{S2})$$

where  $F$  is the observed fluorescence intensity for a given time point as denoted by subscripts;  $t = 0$  is the start of the experiment,  $t = \infty$  is the endpoint. The observed pseudo-first-order rate constant is denoted  $k_o$  and time (in mins) is given as  $t$ .

Cysteine pK<sub>a</sub> values for each single cysteine variant were determined by fitting a plot of the pseudo-first-order rate constants as a function of pH to a form of the Henderson-Hasselbach equation. For

single protonation/deprotonated events, Equ. S3 was used, while for two independent protonation/deprotonation events, Equ. S4 was used:

$$k_o = k_b + \frac{k_1}{1 + 10^{pK_{a1} - pH}} \quad (S3)$$

$$k_o = k_b + \frac{k_1}{1 + 10^{pK_{a1} - pH}} + \frac{k_2}{1 + 10^{pK_{a2} - pH}} \quad (S4)$$

In Equ. S3 and S4,  $k_o$  is the pseudo-first-rate constant,  $k_b$  is the baseline rate constant,  $k_1$  and  $k_2$  are the rate constants for badan modification of the first and second deprotonated cysteines. In all fits,  $k_b$  refined to negligible values.

## SUPPLEMENTAL TABLES

**Table S1. Oligonucleotides used as primers**

| Name  | Sequence                                           | Restriction site or mutation |
|-------|----------------------------------------------------|------------------------------|
| LE051 | 5' - CGGGGTACCGGTGCGGCACAAGCTGAG -3'               |                              |
| LE052 | 5' - GTGCAAGCTTGCTCTCAGCTATTCTTCC -3'              | <i>HindIII</i>               |
| LY001 | 5' - TATGGATCCGGTGCGGCACAAGCTGAG -3'               | <i>BamHI</i>                 |
| LY002 | 5' - TCTTGTTCGACATGAAAAAAGCTGAGAGTCTATGC -3'       | <i>SalI</i>                  |
| LY003 | 5' - CATT TTTTGGACGTCATGGGCACCGCCCTGCAAAAAGGAG -3' | C65A                         |
| LY004 | 5' - CTCCTTTTTCAGGGCGGTGCCCATGACGTCCAAAAATG -3'    | C65A                         |
| LY005 | 5' -GACGTCATGGTGCCCGCCCGCCAAAAAGGAGCTTCCACAG-3'    | C68A                         |
| LY006 | 5' -CTGTGGAAGCTCCTTTTTGGCGGGCGGGCACCATGACGTC -3'   | C68A                         |
| LY007 | 5' - GCCCGCCCTGCAAAAAGCAGCTTCCACAGTTTCAATCG-3'     | E71Q                         |
| LY008 | 5' - CGATTGAAACTGTGGAAGCTGCTTTTTGCAGGGCGGGC-3'     | E71Q                         |

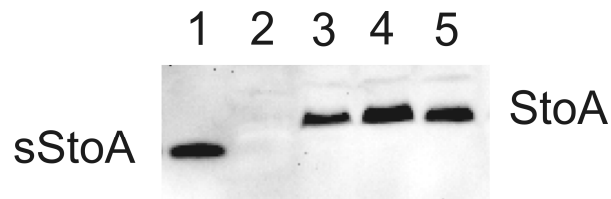

**Fig. S1. Western blot analysis for StoA variants.**

*B. subtilis* strains were grown in NSMP with 1 mM IPTG and the cells harvested when the cultures entered stationary growth phase. Proteins in the membrane fraction were separated by SDS-PAGE and probed for StoA antigen. Lane 1, 20 ng of purified sStoA; lane 2, LUL30/pDG148 (negative control); lanes 3-5, LUL30 containing pLYM012, pLYM013 or pLYM015 (encoding E71Q, C68A and C65A variants of StoA, respectively). Approximately 40  $\mu$ g of membrane protein was loaded in each lane 2-5.

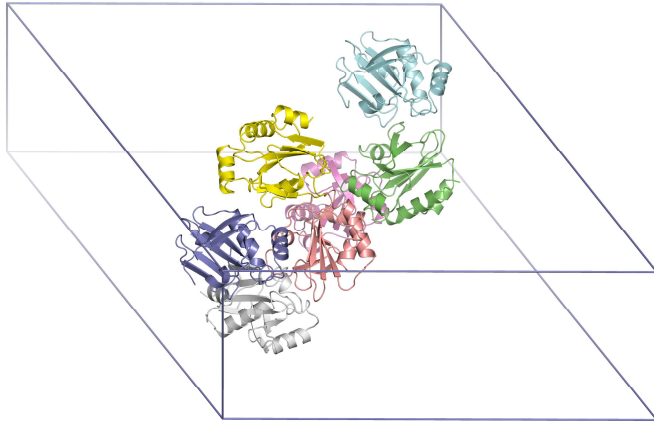

**Fig. S2. The asymmetric unit of the sStoA crystals used for structural analysis.** The seven sStoA polypeptides found in the asymmetric unit are color coded. See the main paper for details.

## SUPPLEMENTARY REFERENCES

1. Hutchinson, R. S., and Ort, D. R. (1995) *Meth. Enzymol.* **252**, 220-228.
2. Bulaj, G., Kortemme, T., and Goldenberg, D. P. (1998) *Biochemistry* **37**, 8965-8972
3. Nelson, J. W., and Creighton, T. E. (1994) *Biochemistry* **33**, 5974-5983
4. Lewin, A., Crow, A., Oubrie, A., and Le Brun, N. E. (2006) *J. Biol. Chem.* **281**, 35467-35477

## AUTHOR CONTRIBUTIONS

AC conducted the crystallographic work, measured redox potentials, cysteine pK<sub>a</sub> values, and pH stabilities. MCM aided AC in initial crystallization trials and produced sStoA protein. YL constructed plasmids, carried out mutagenesis and produced sStoA protein variants and SeMet-labeled protein, conducted Mal-PEG experiments and performed *in vivo* sporulation assays and some of the Western blots. NLB and LH planned and supervised the project. AC, YL, NLB and LH wrote the manuscript.
